# Supplementary figures and images for: Identification and Phylogenetic Analysis of the R2R3-MYB Subfamily in Brassica napus
Source: MDPI journal article supplement (doi:10.3390/plants12040886), 2023-02-16

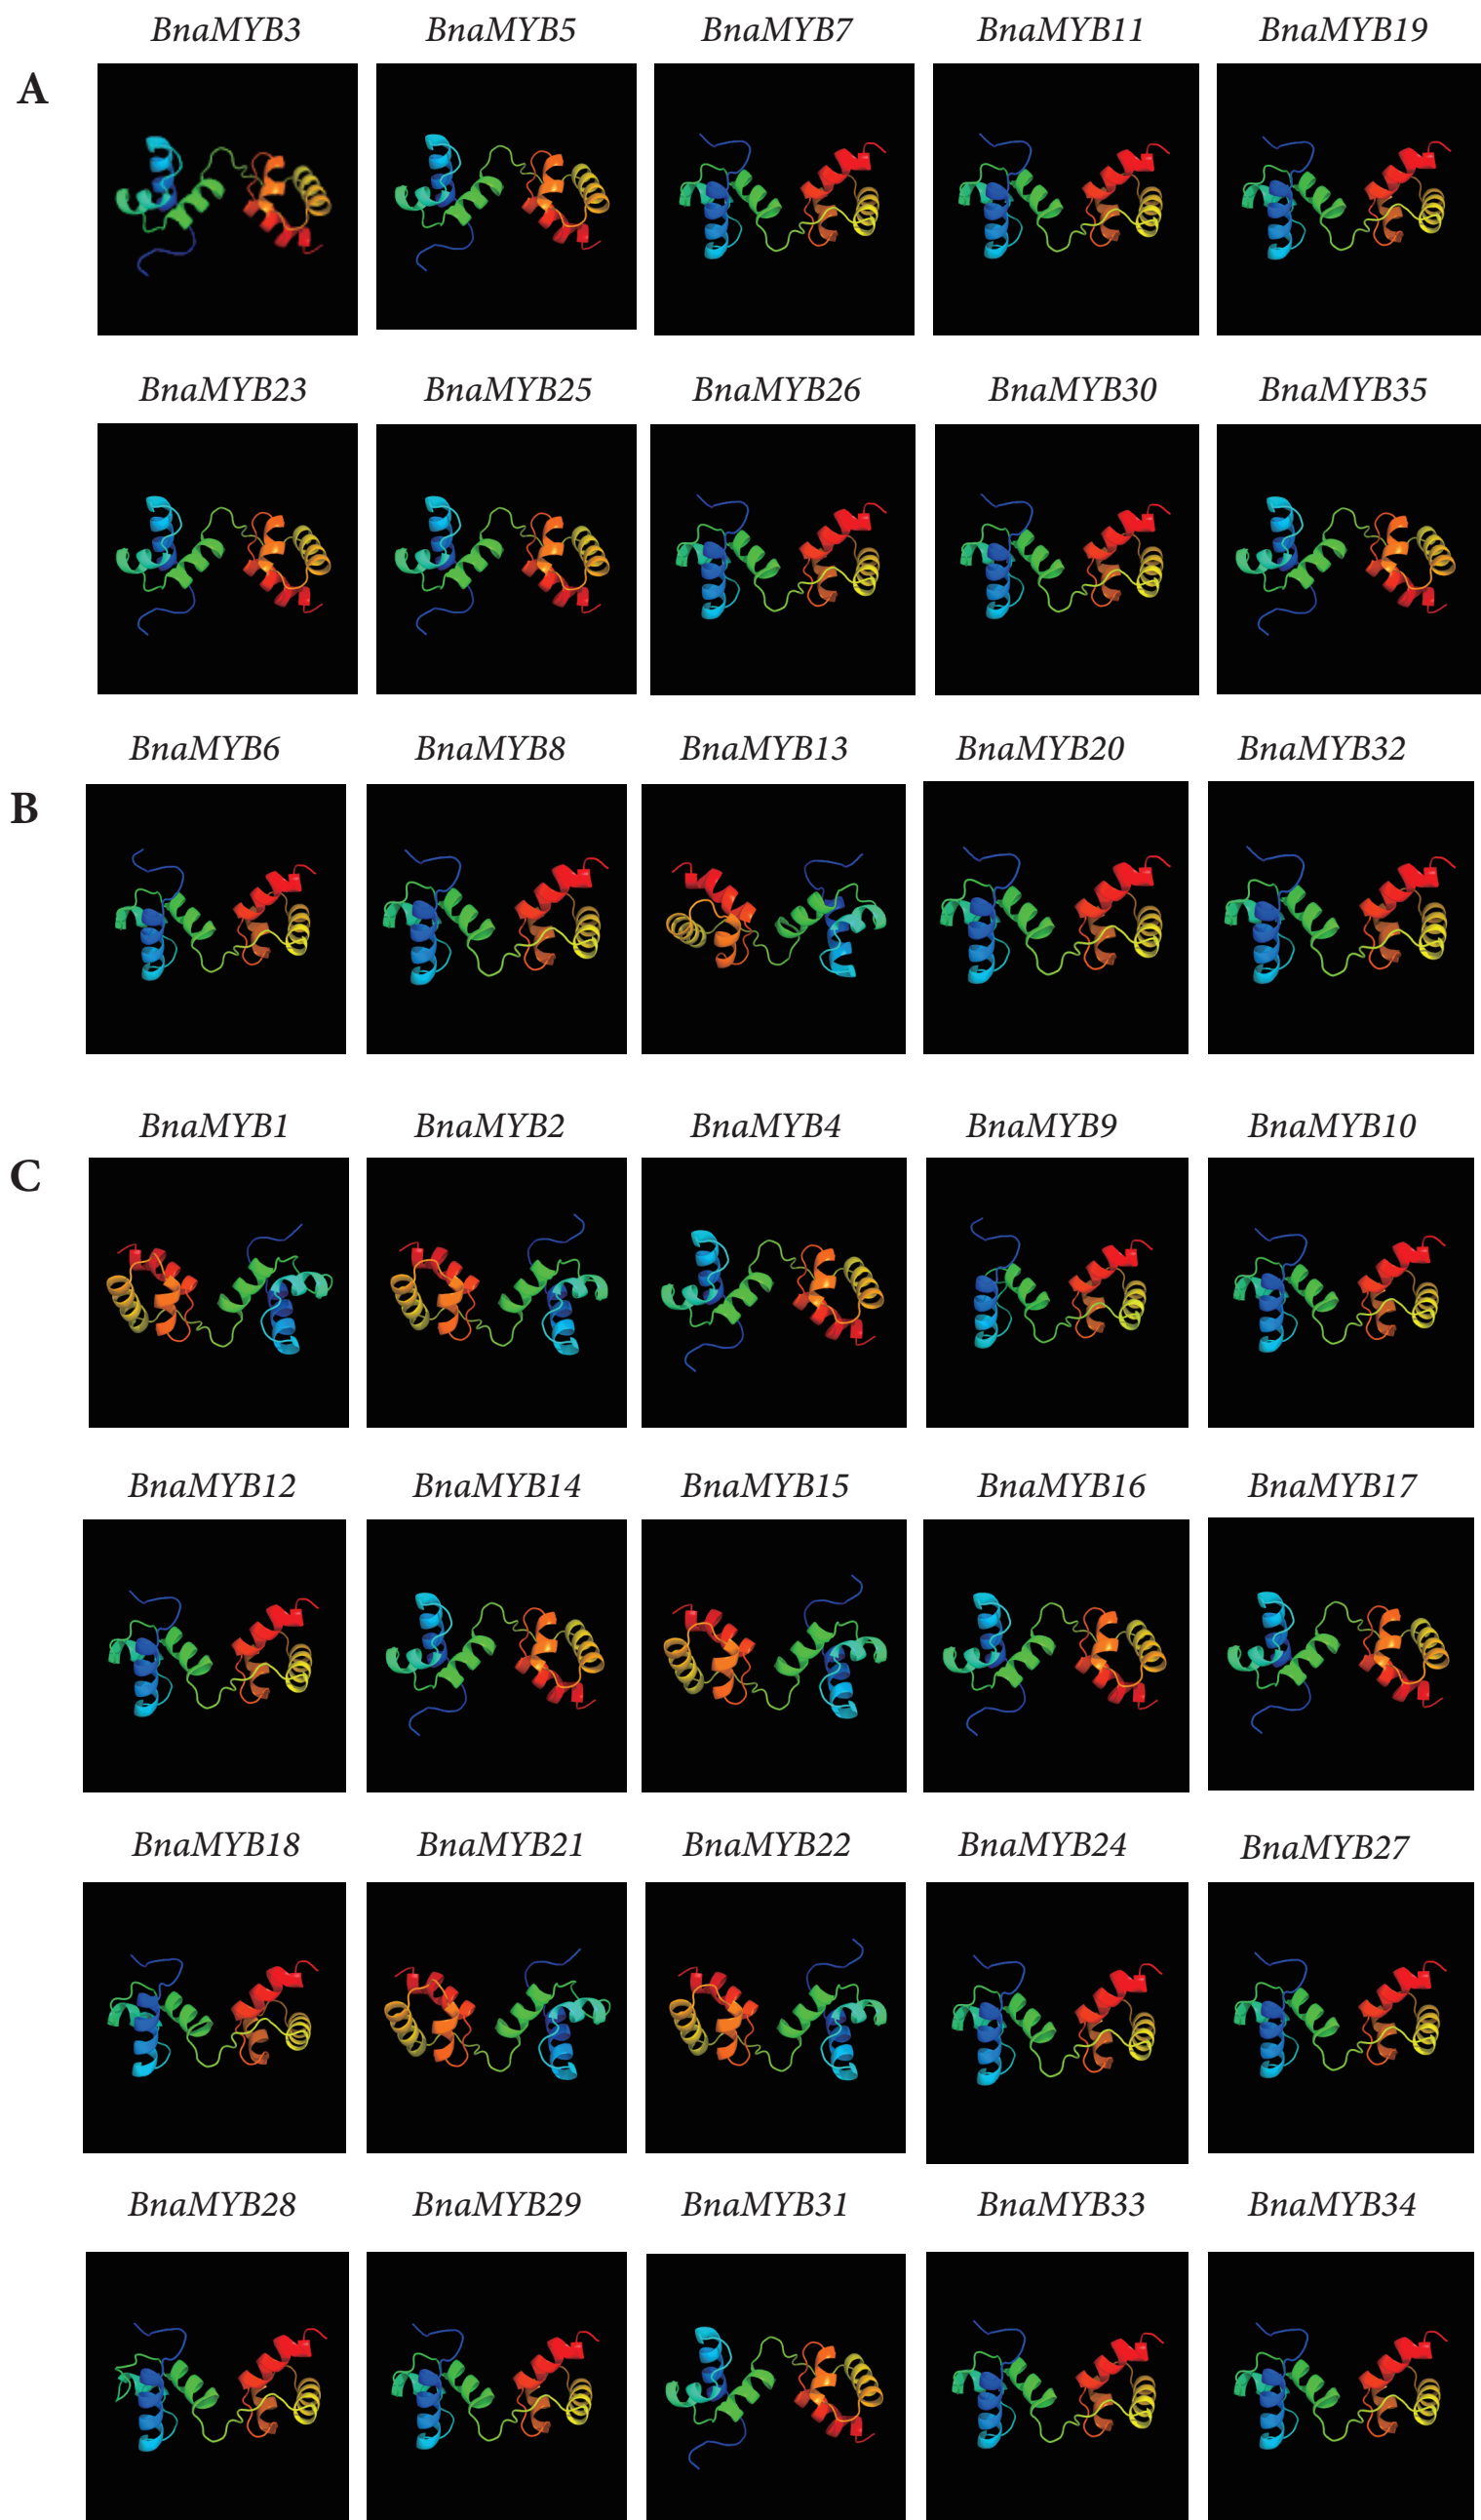

Supplement: s1 [file s1]
